# Supplementary material
Source: PubMed Central journal article supplement (PMC9259369)

**Figure S1 (Related to Figure 1)**

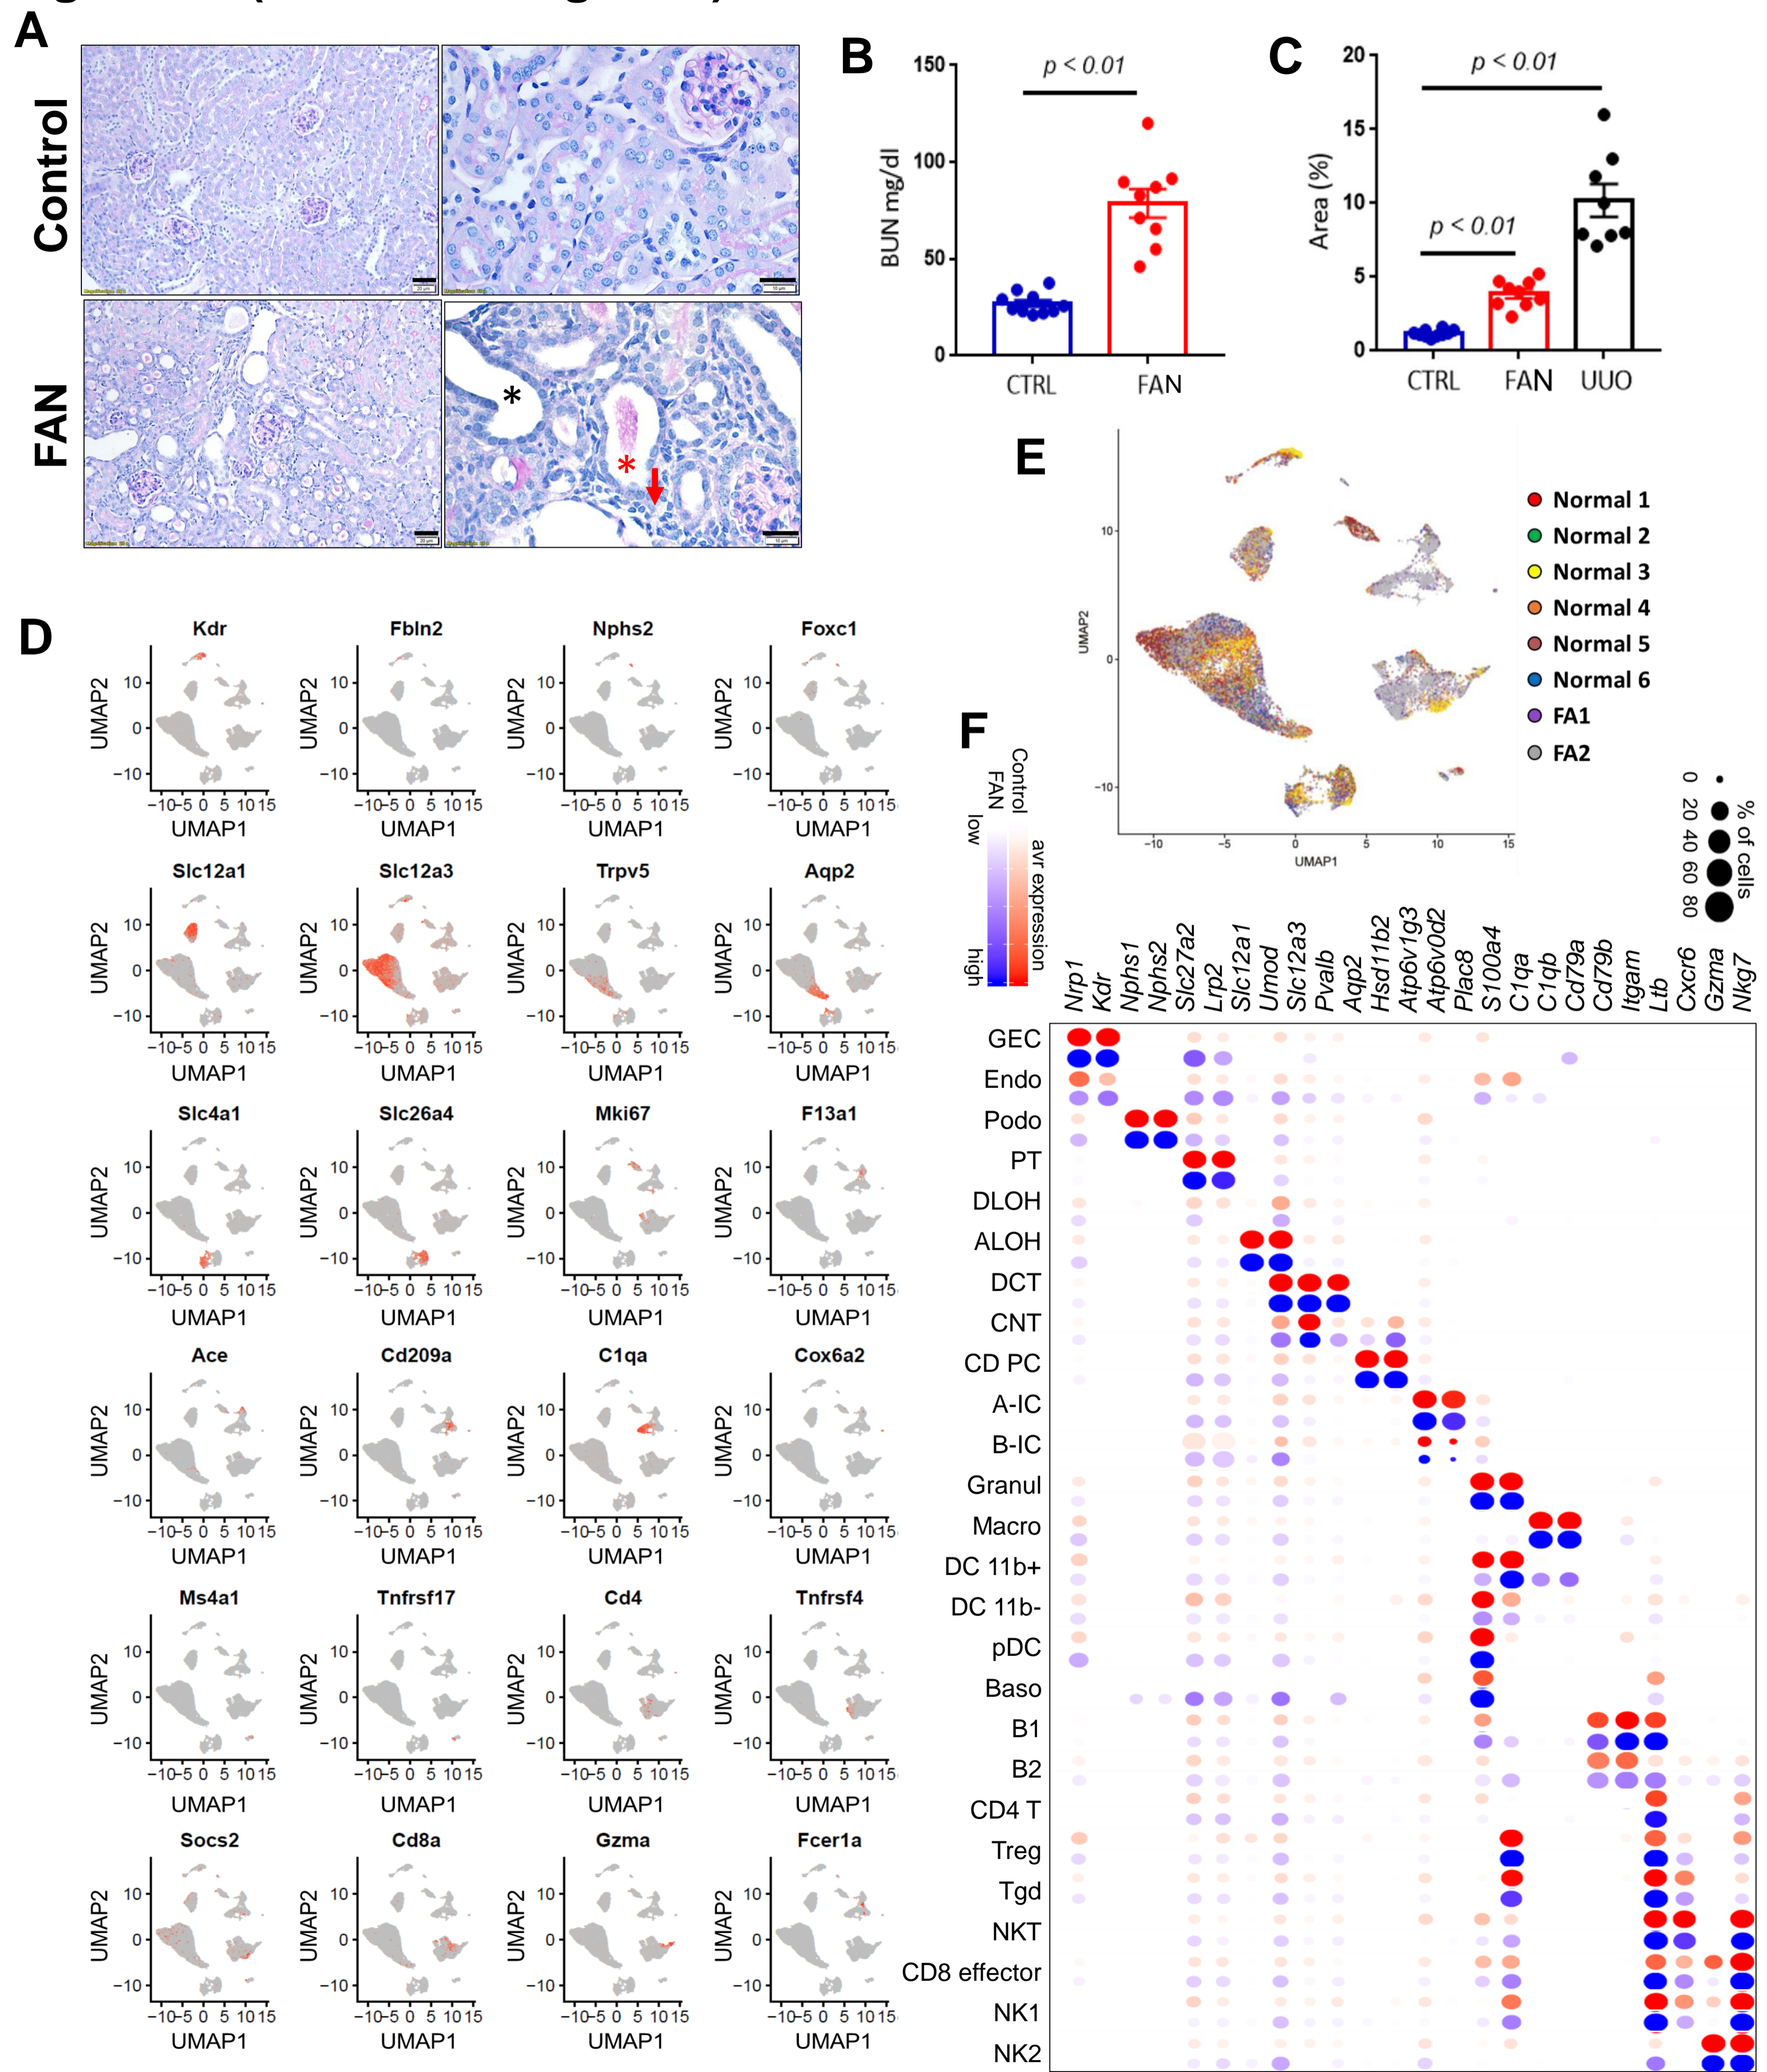

# Figure S2 (Related to Figure 2)

**A**

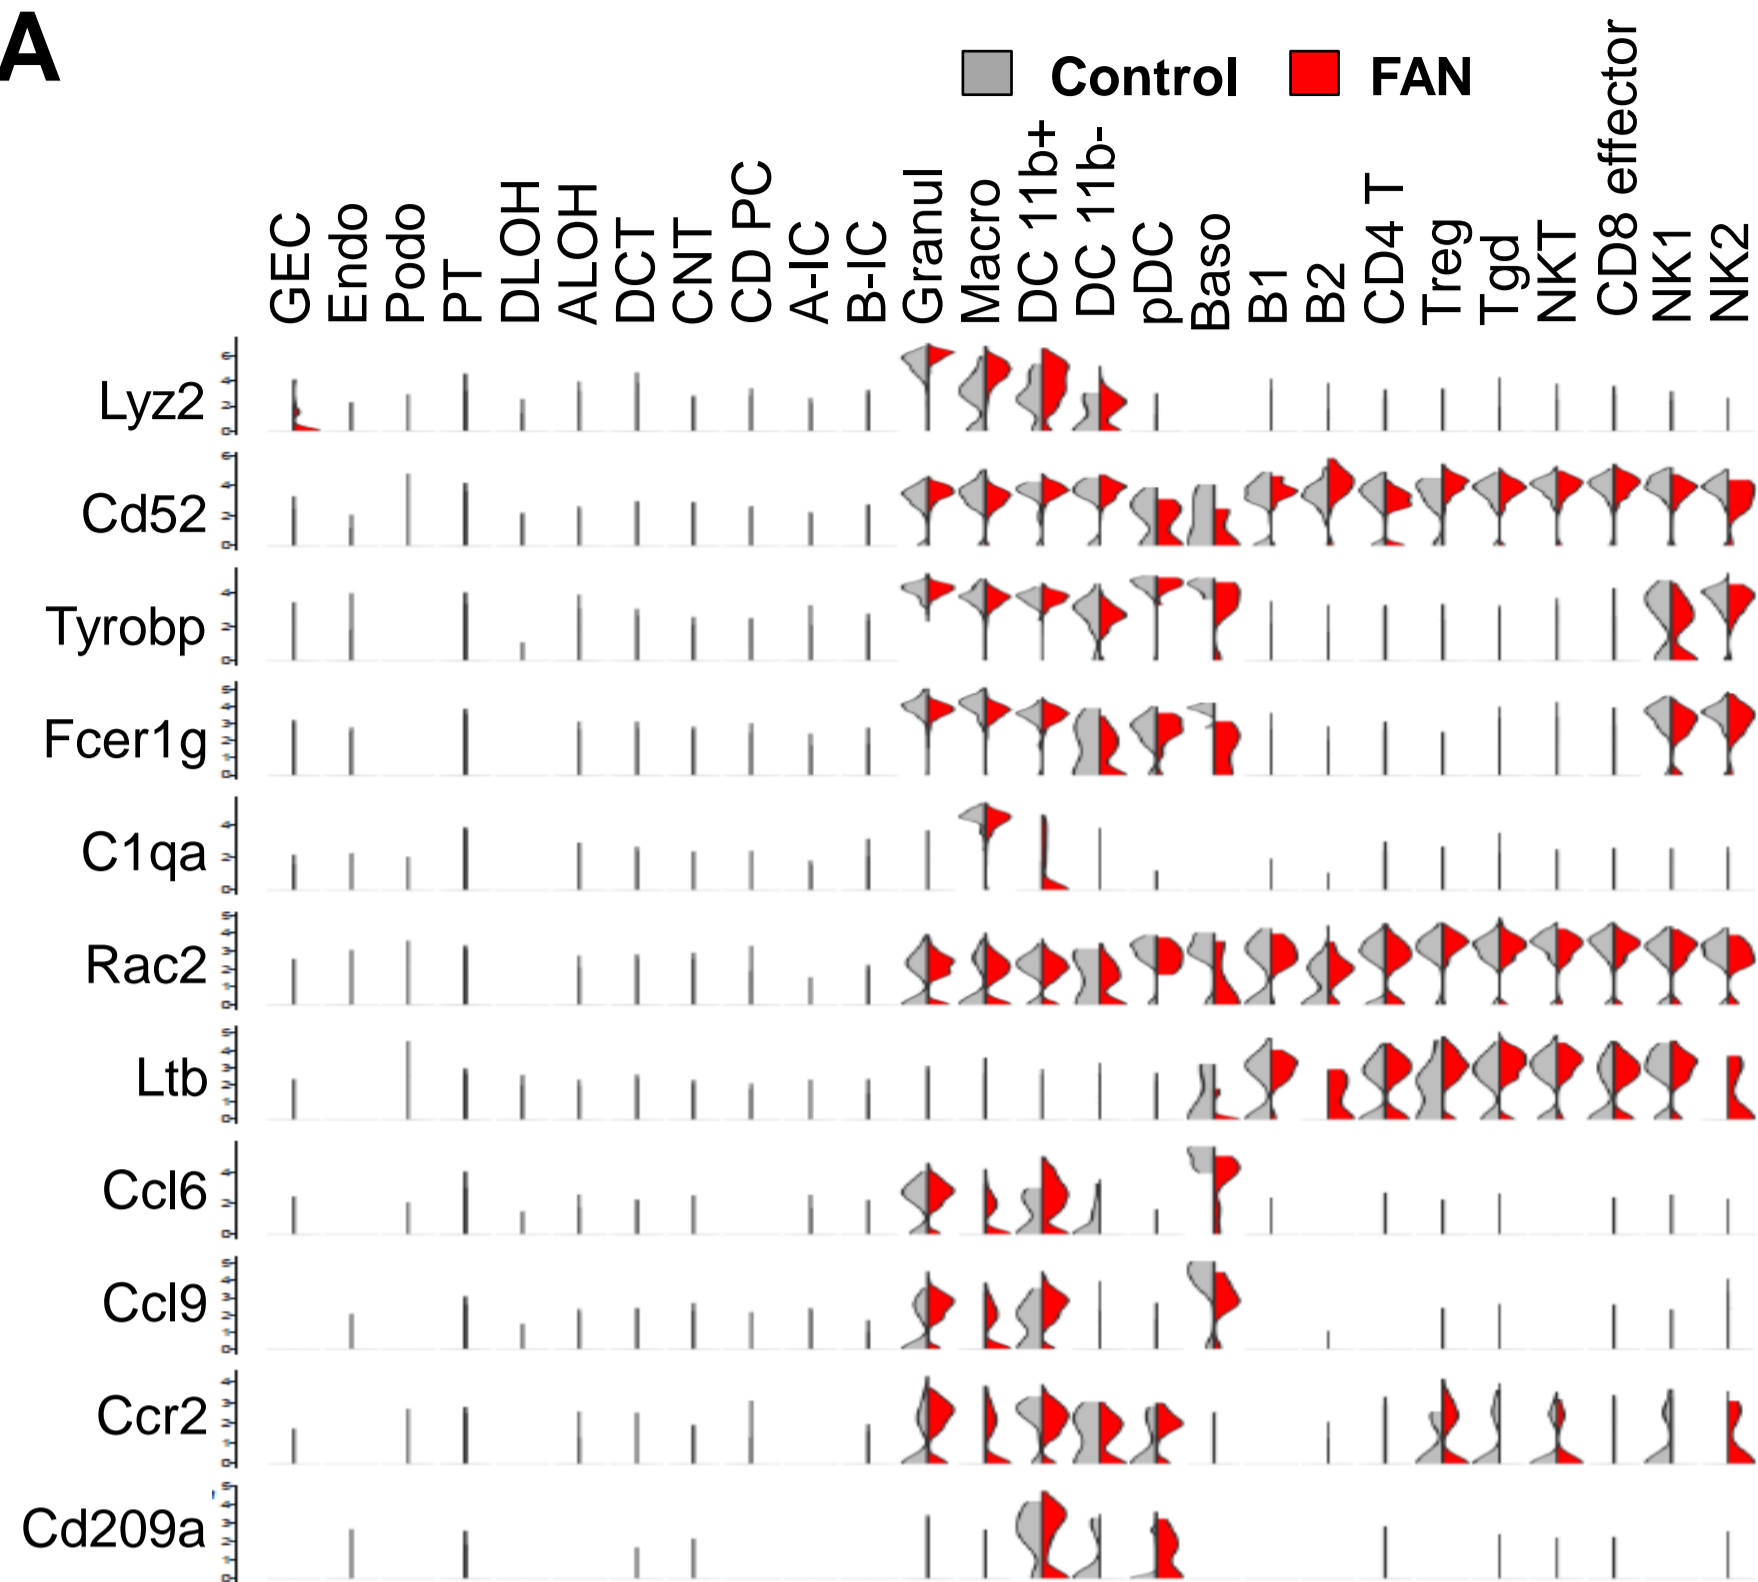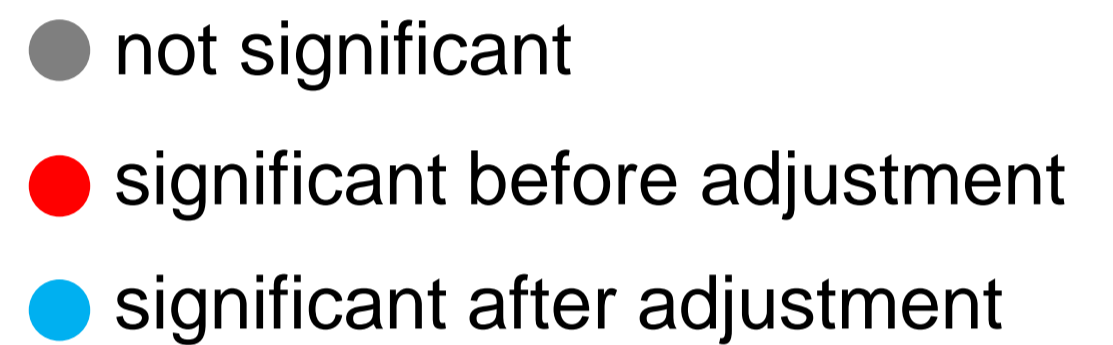

**B**

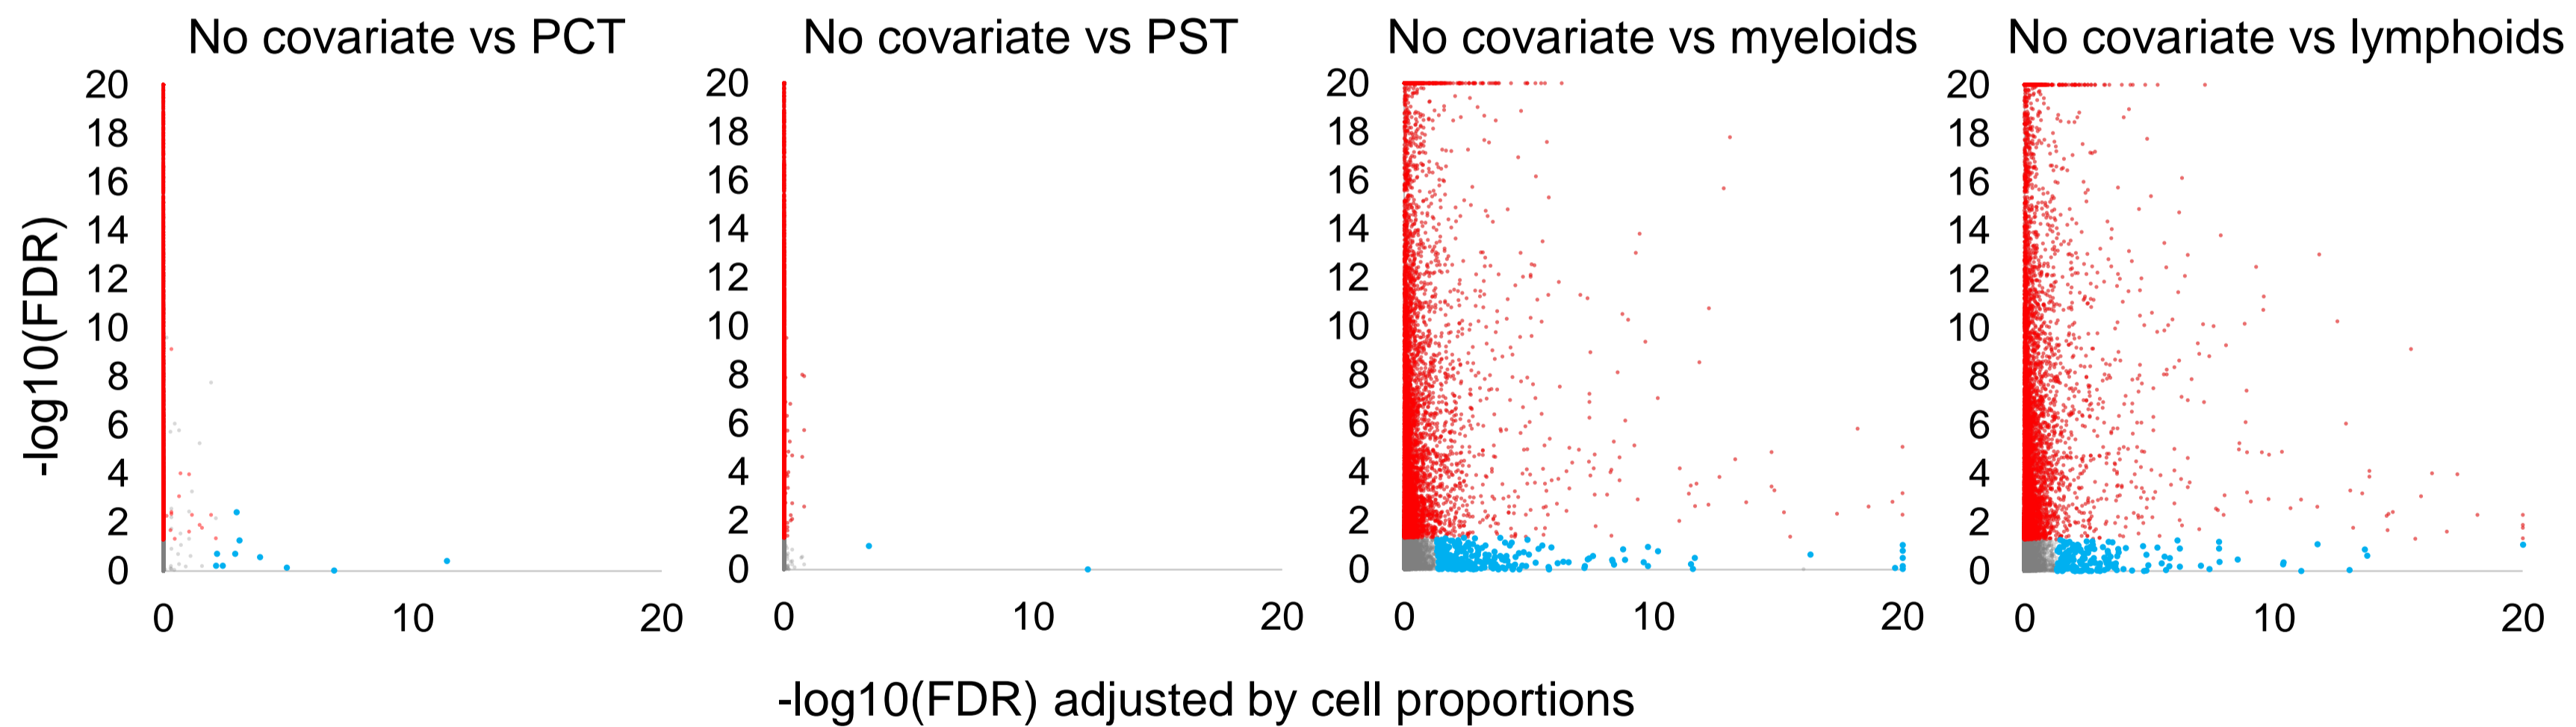

**Figure S3 (Related to Figure 4)**

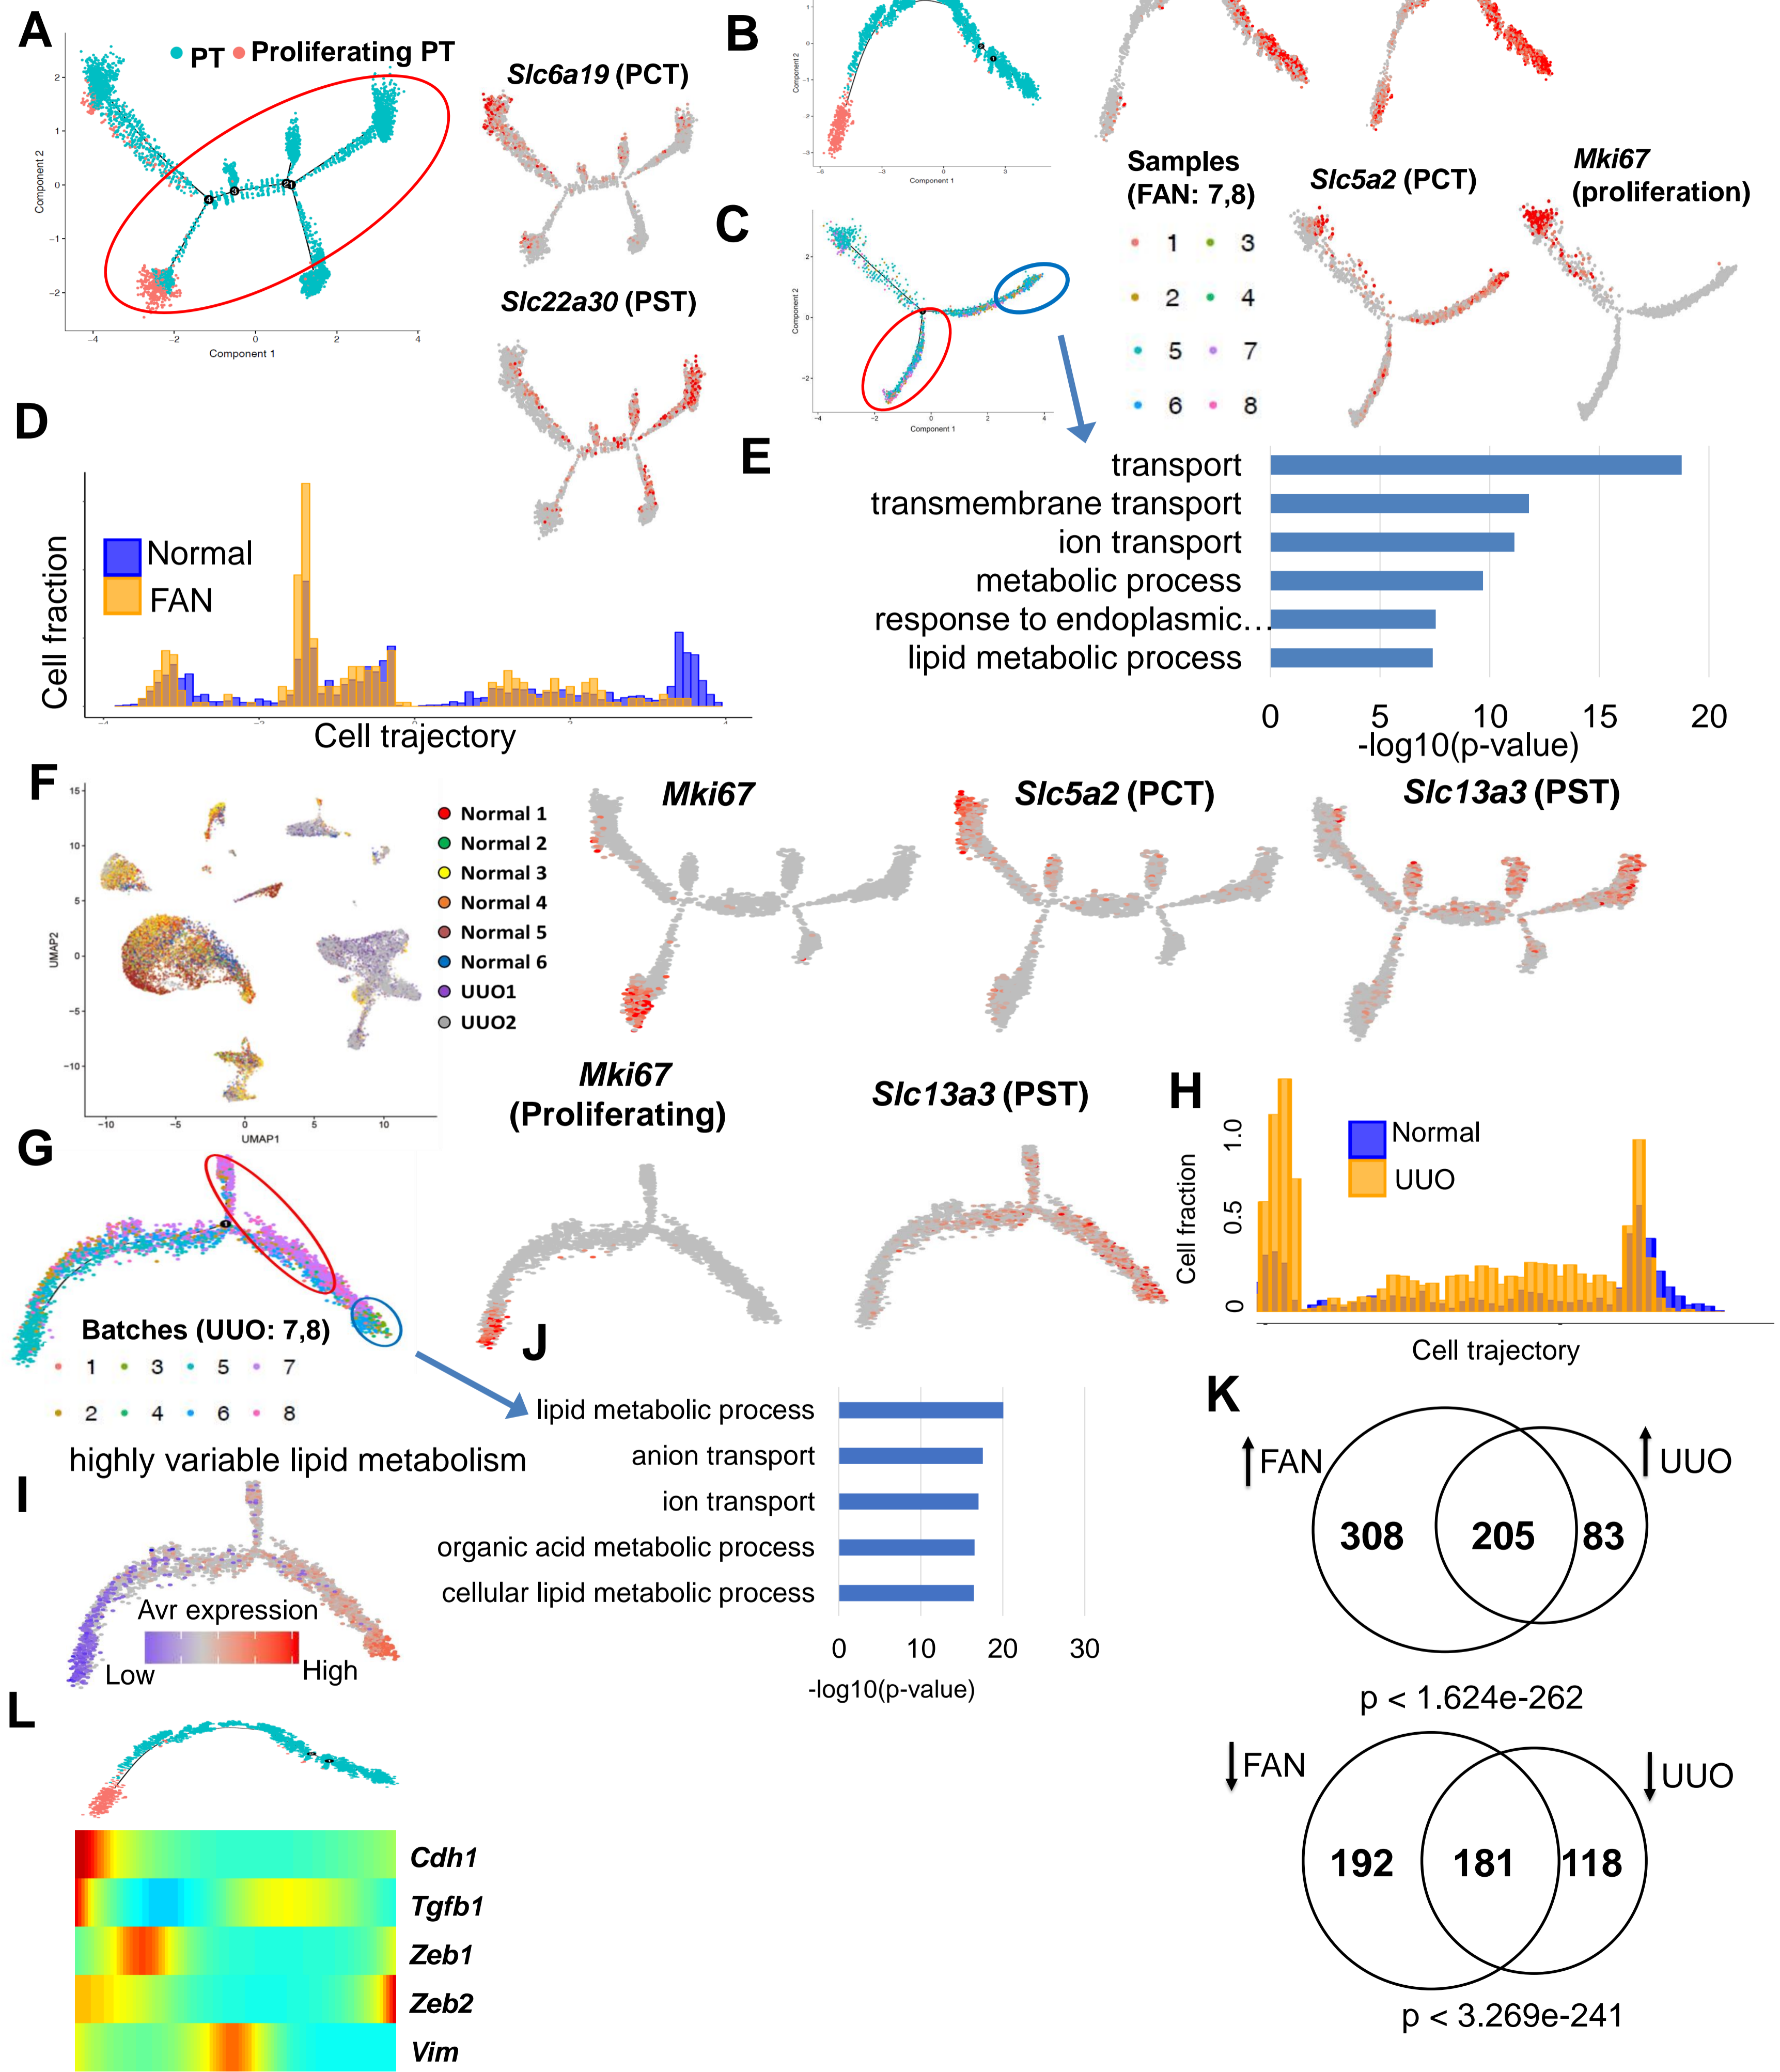

**Figure S4 (Related to Figure 5)**

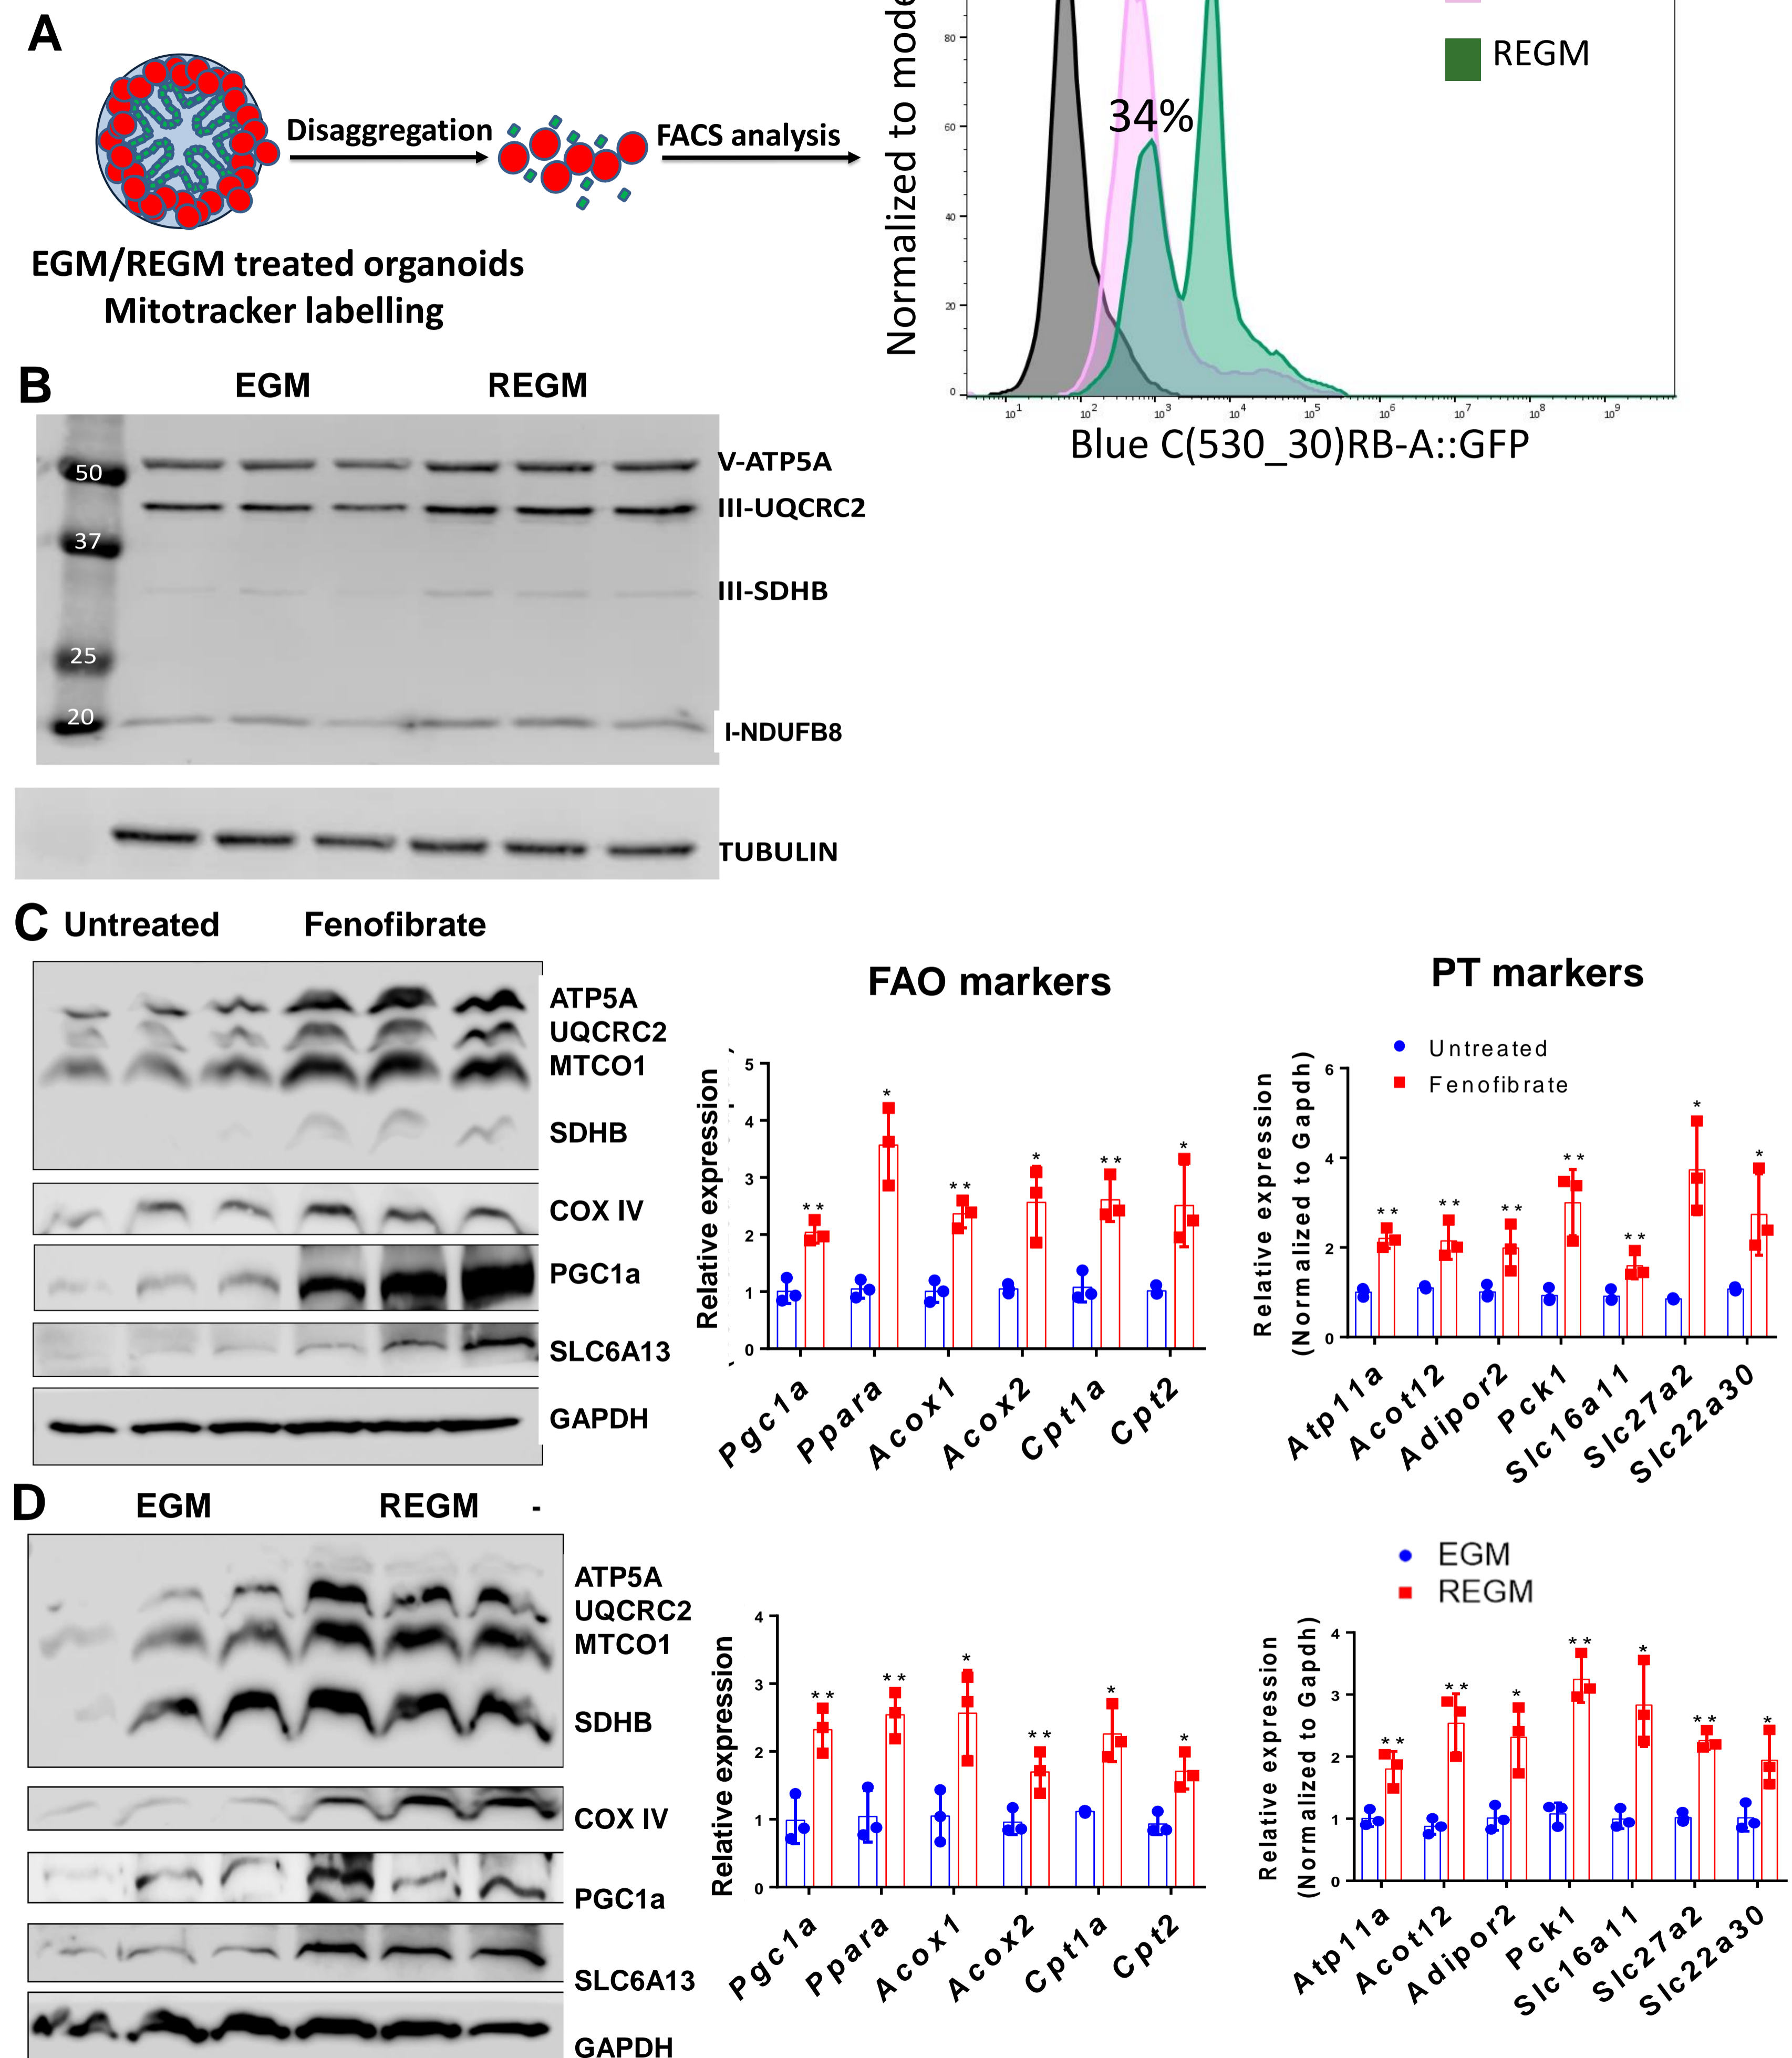

**Figure S5 (Related to Figure 6)**

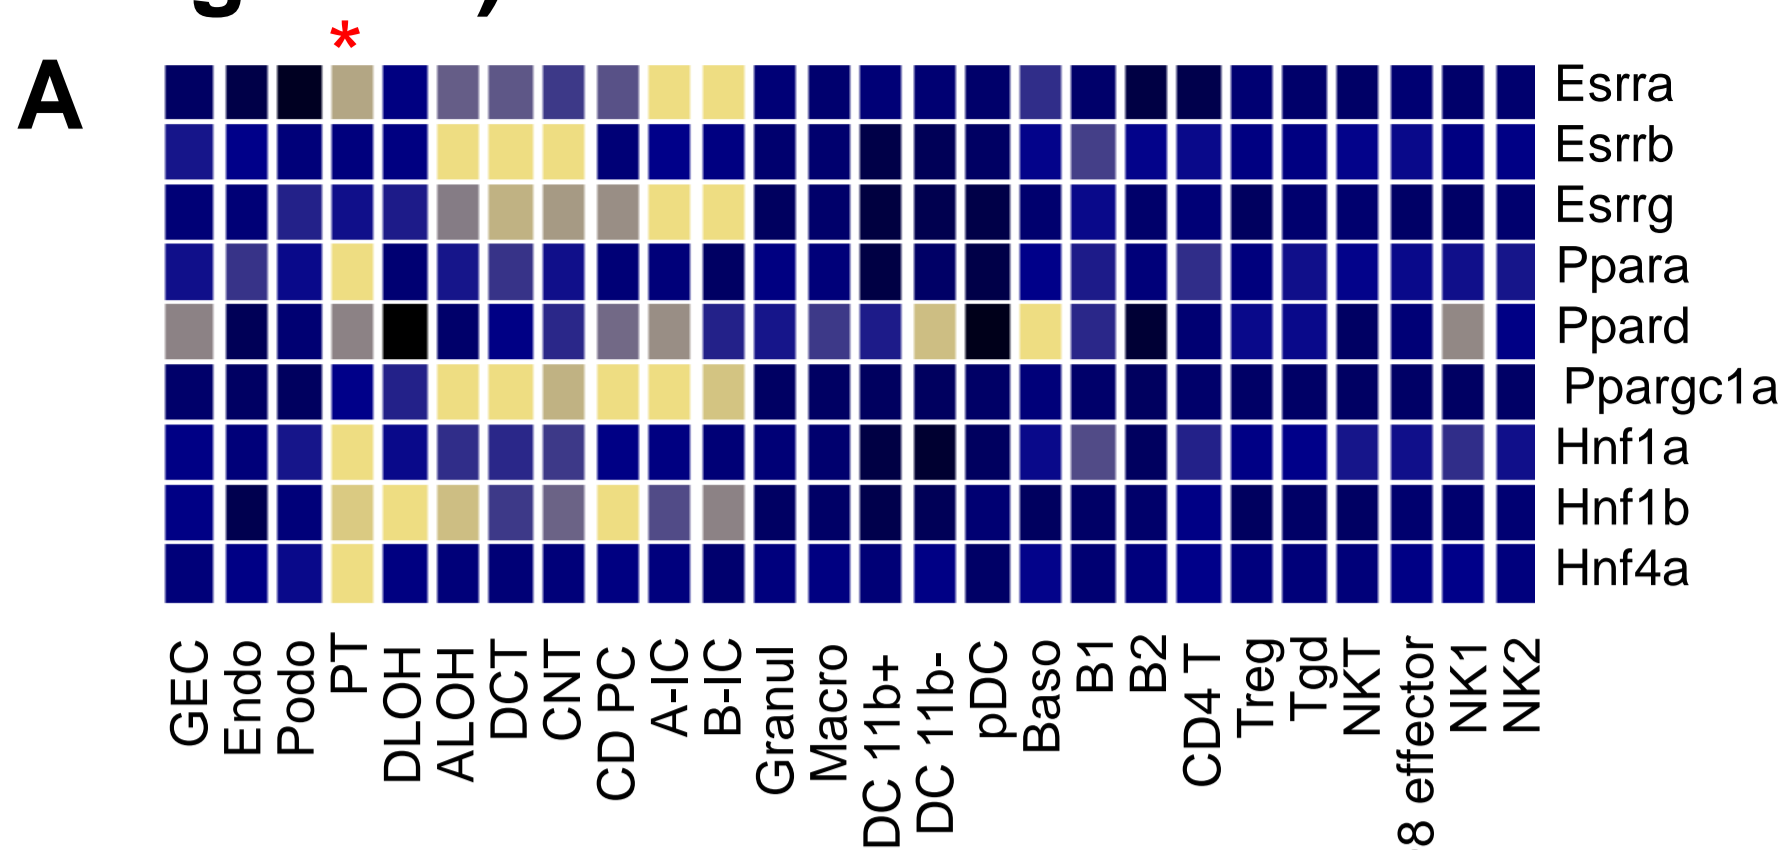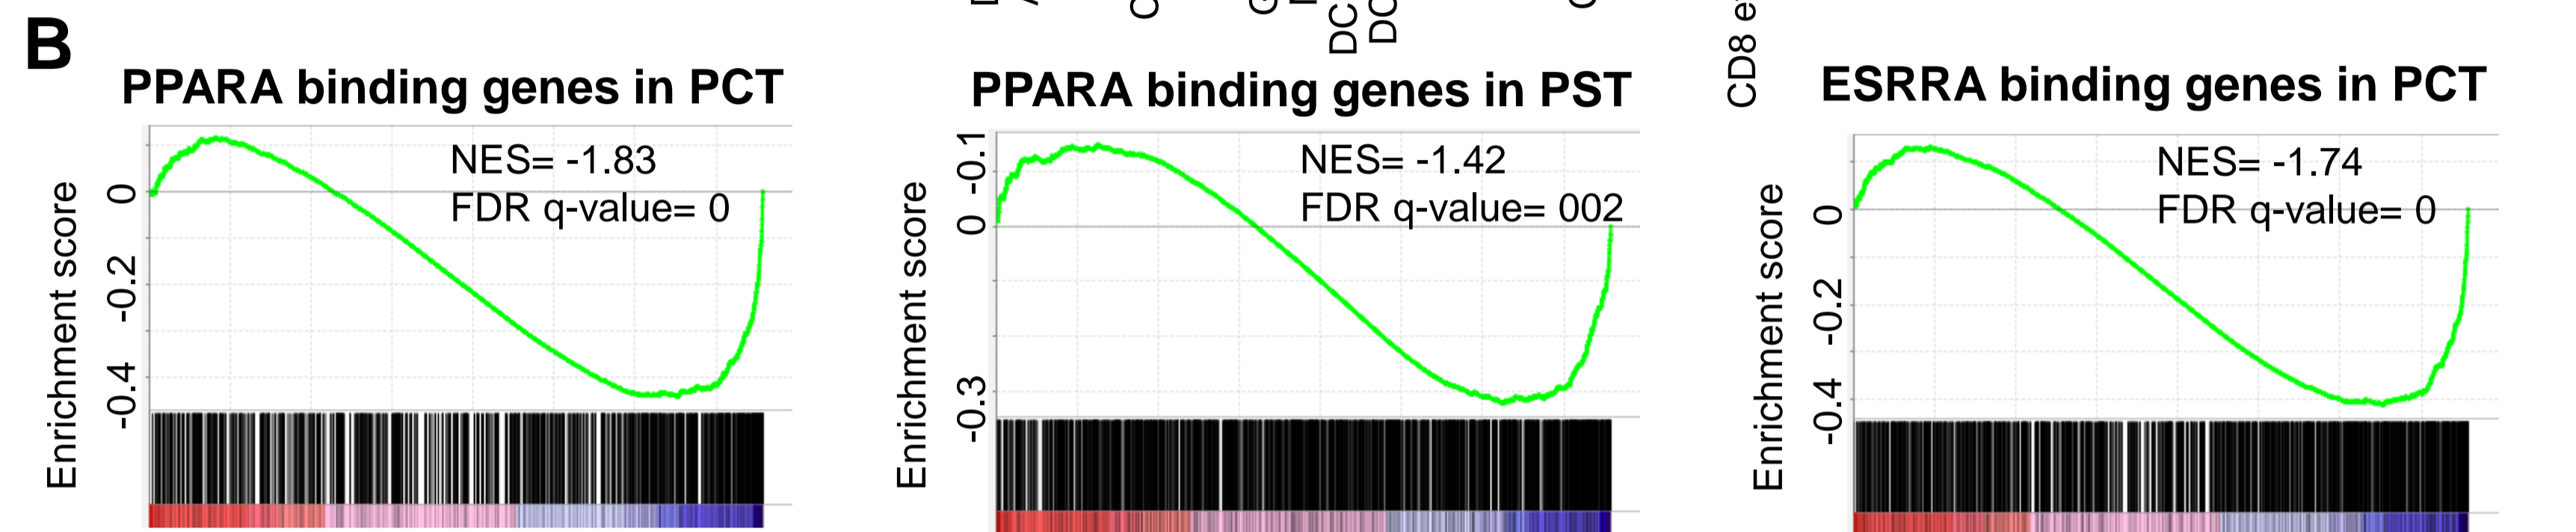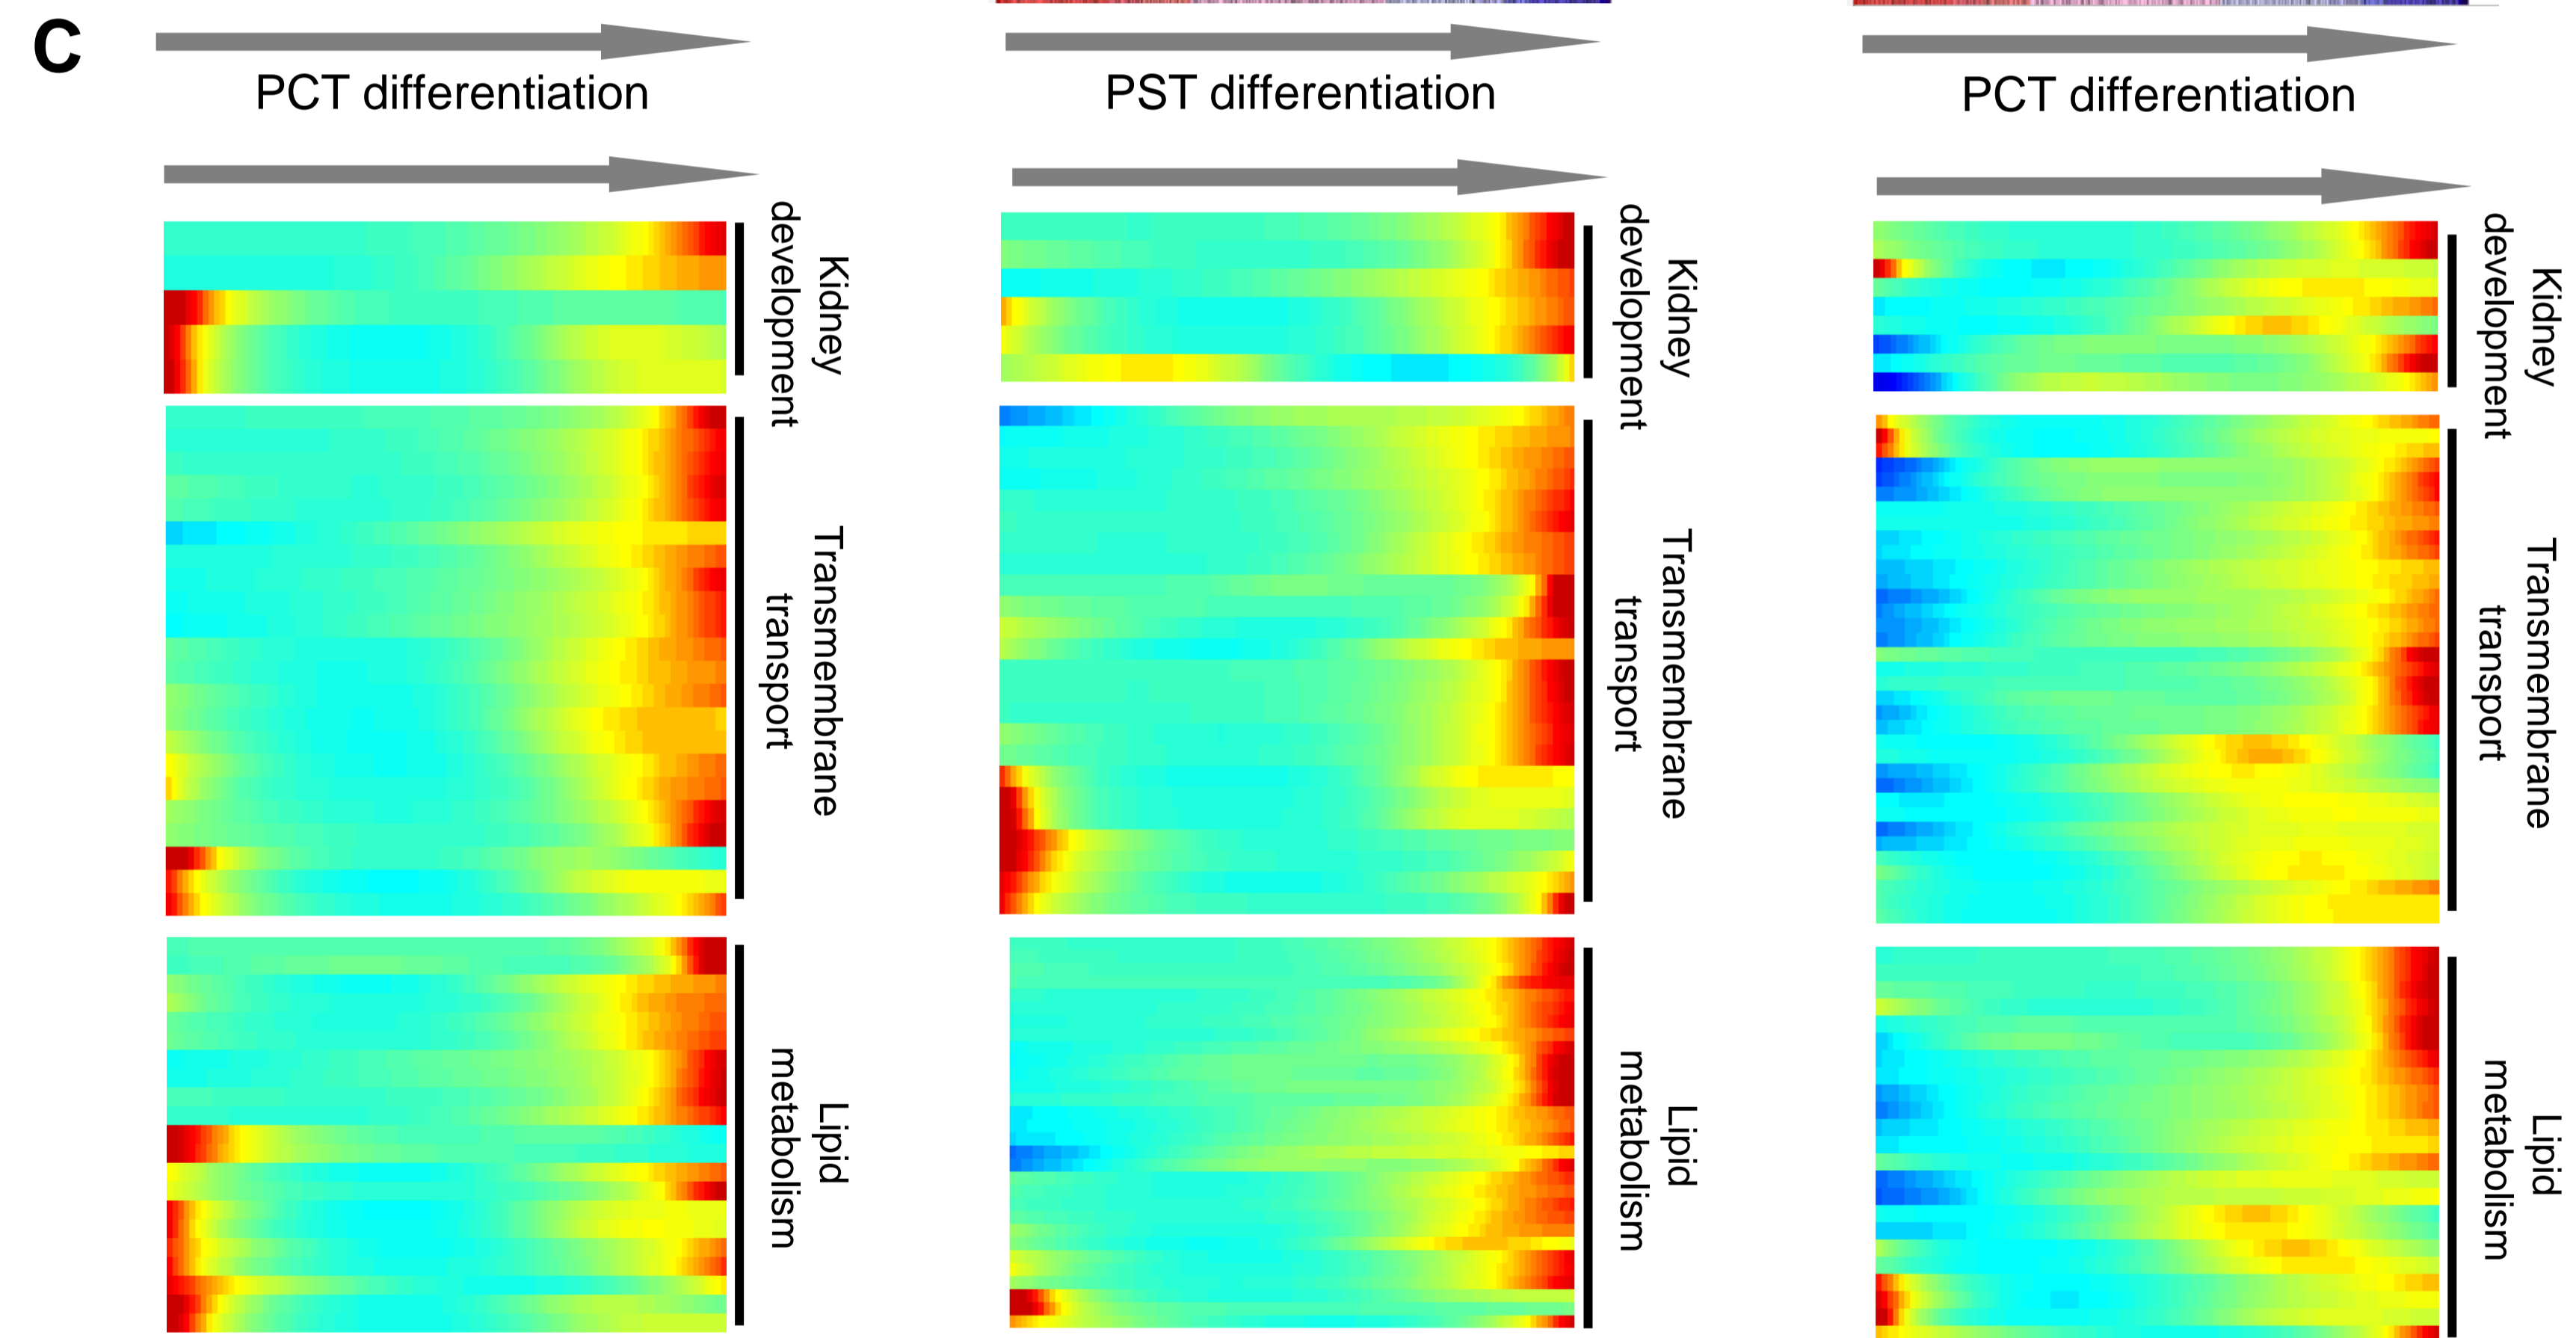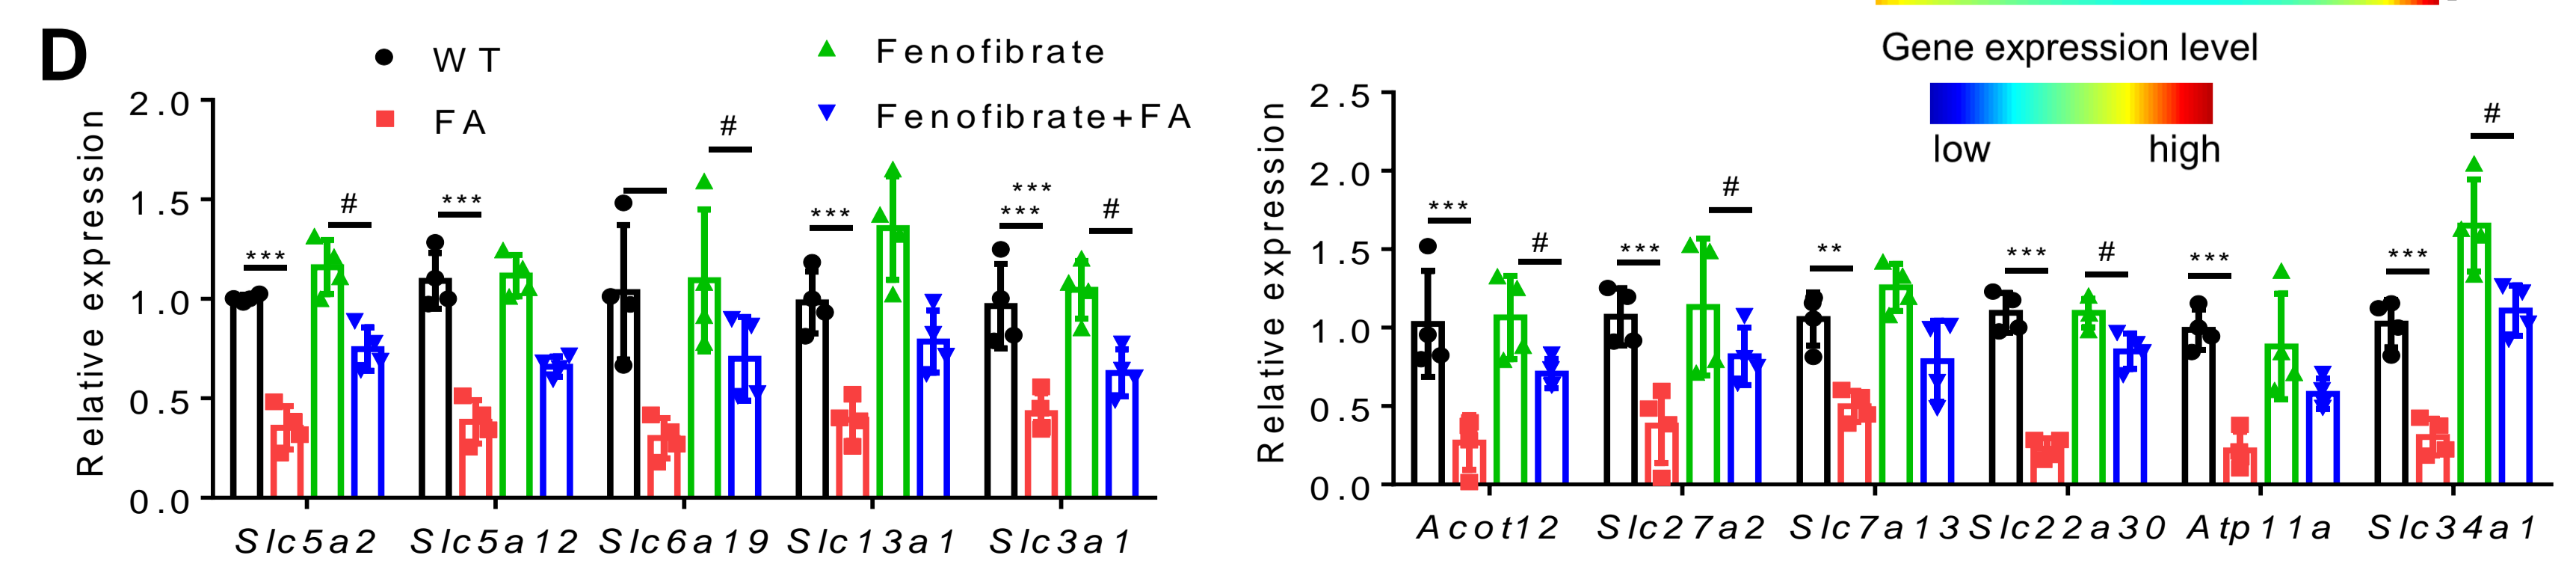

**Figure S6 (Related to Figure 6)**

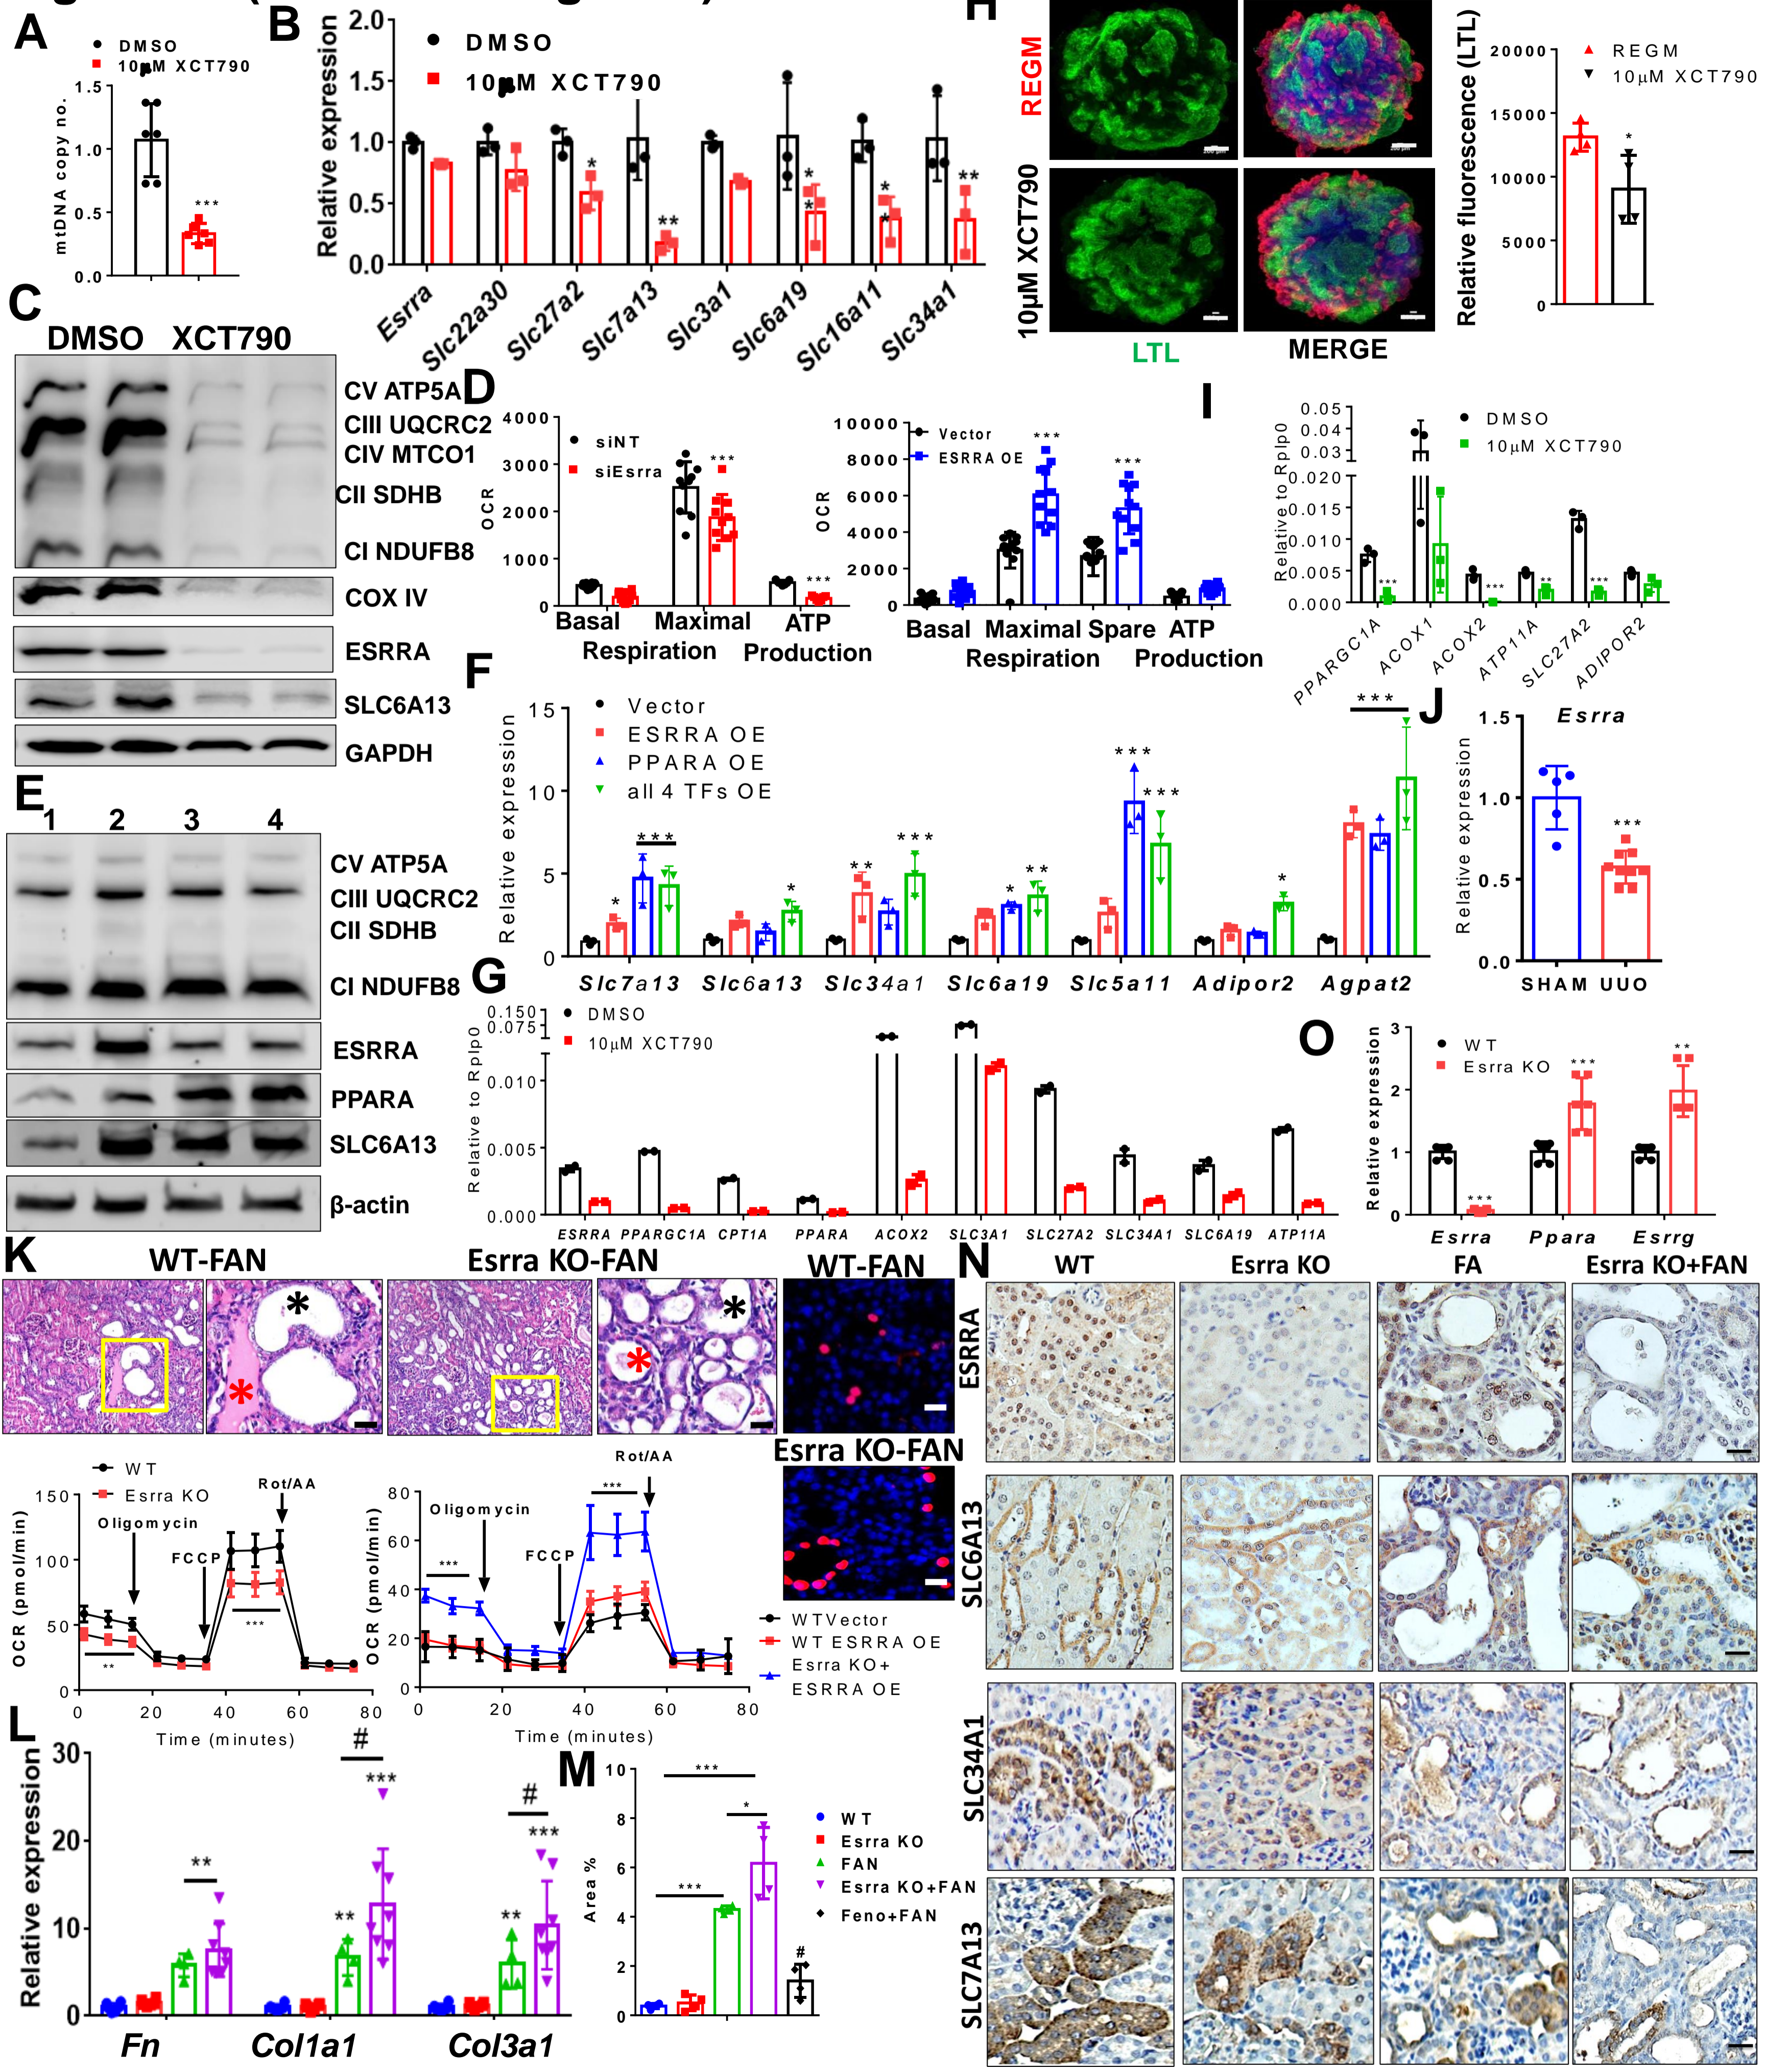

**Figure S7 (Related to Figure 7)**

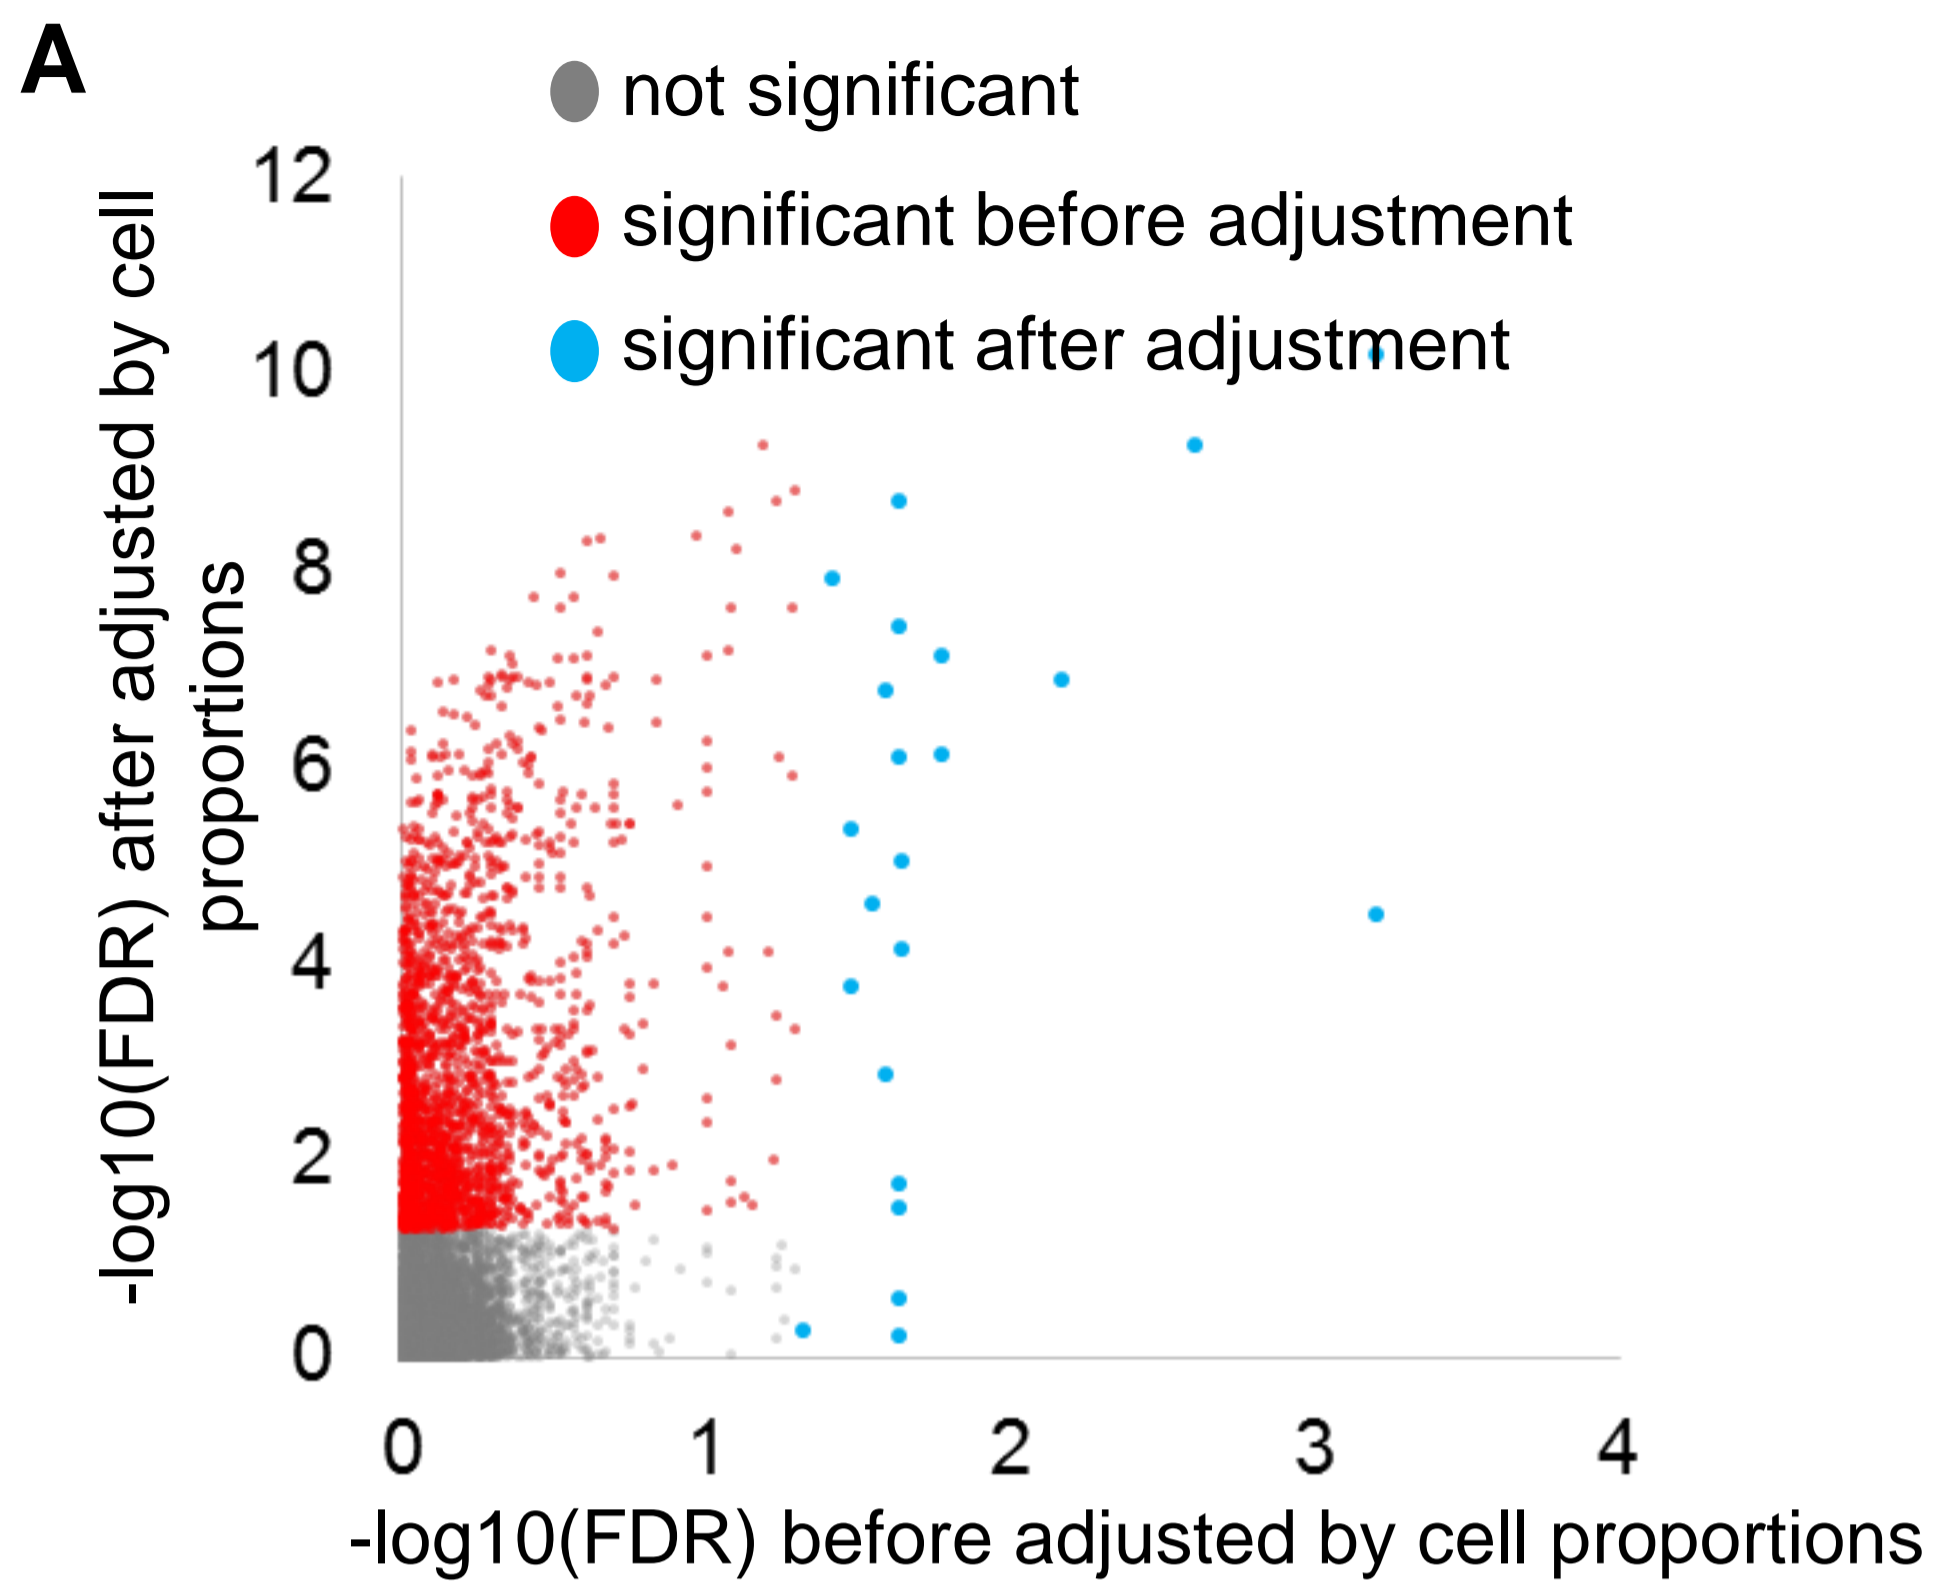

**B**

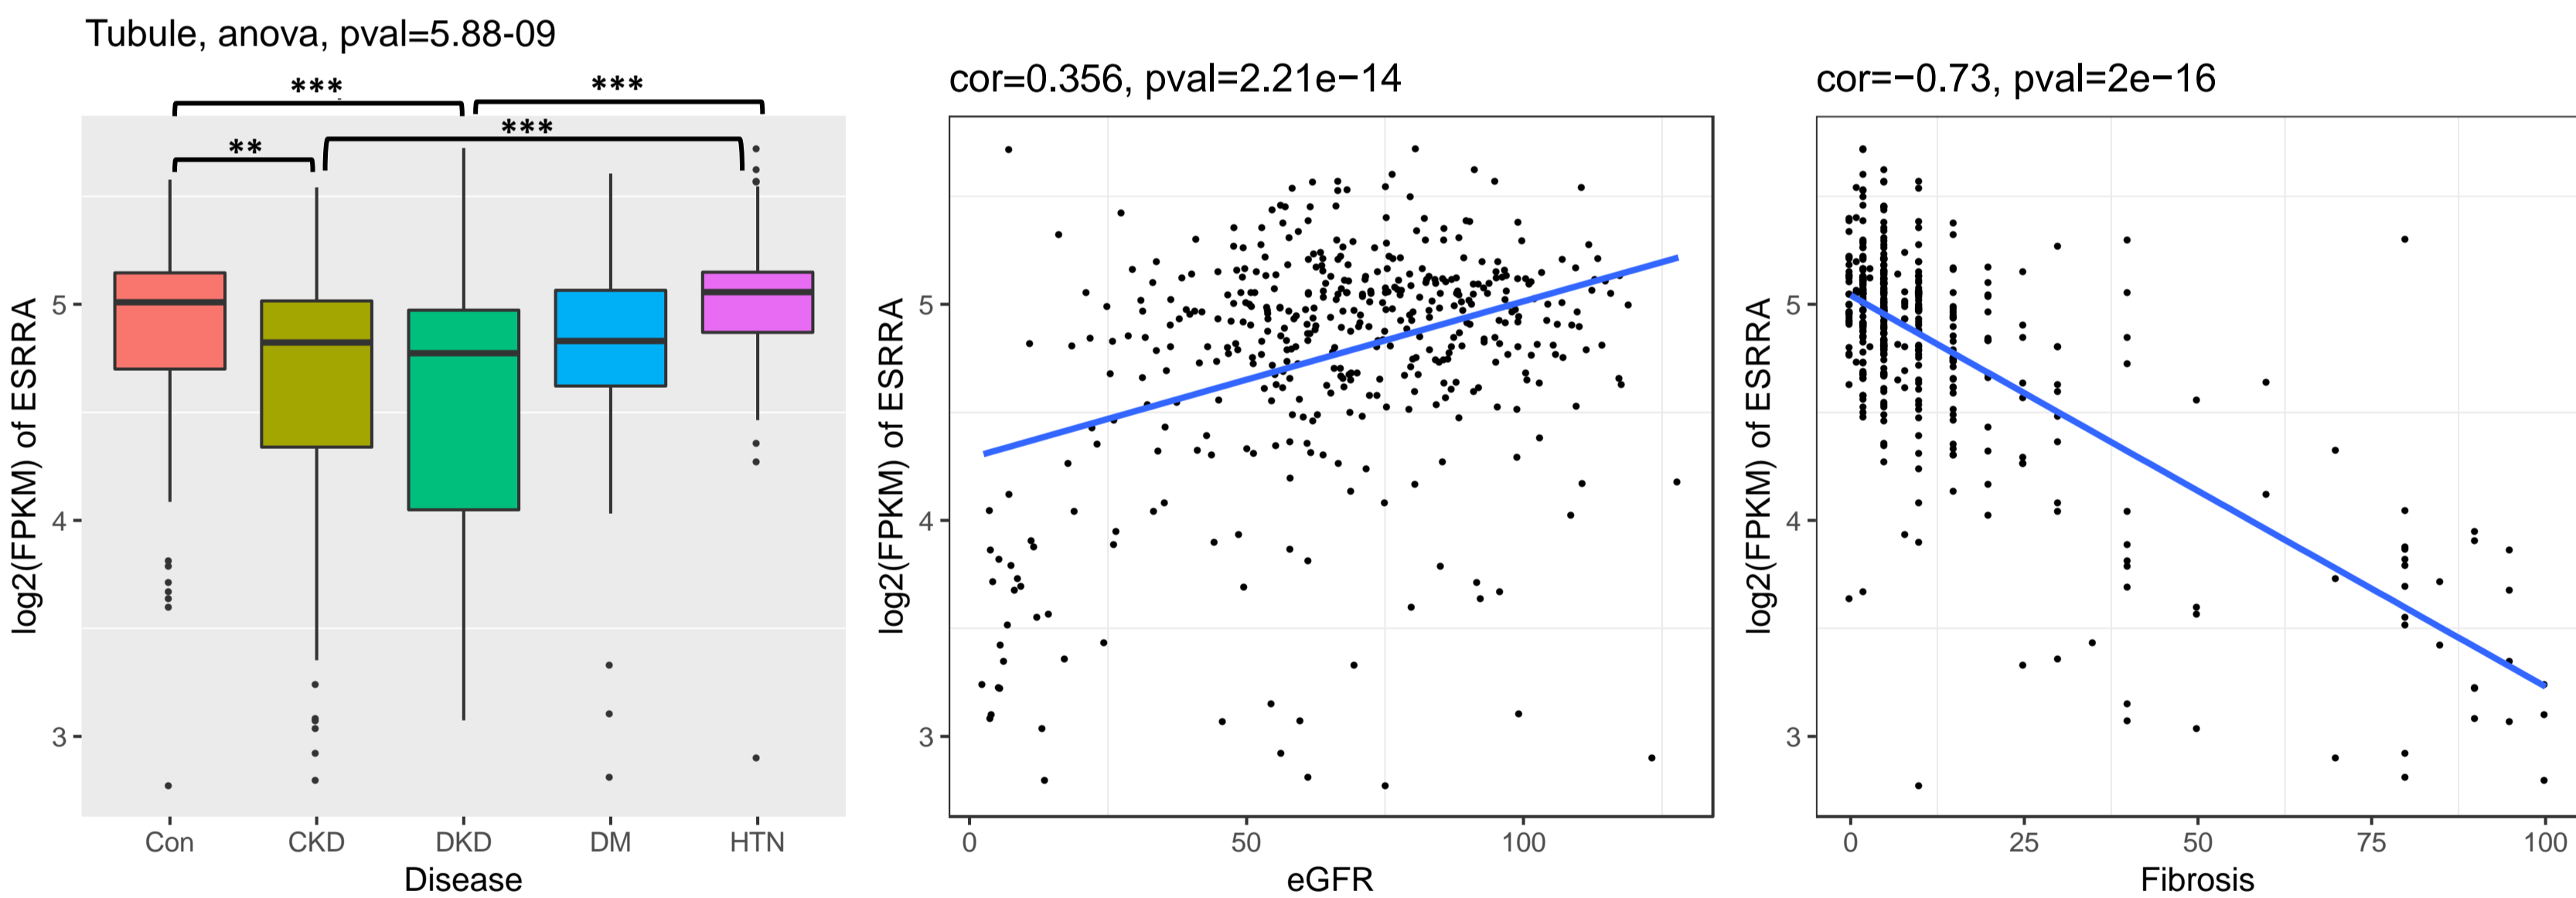

**C**

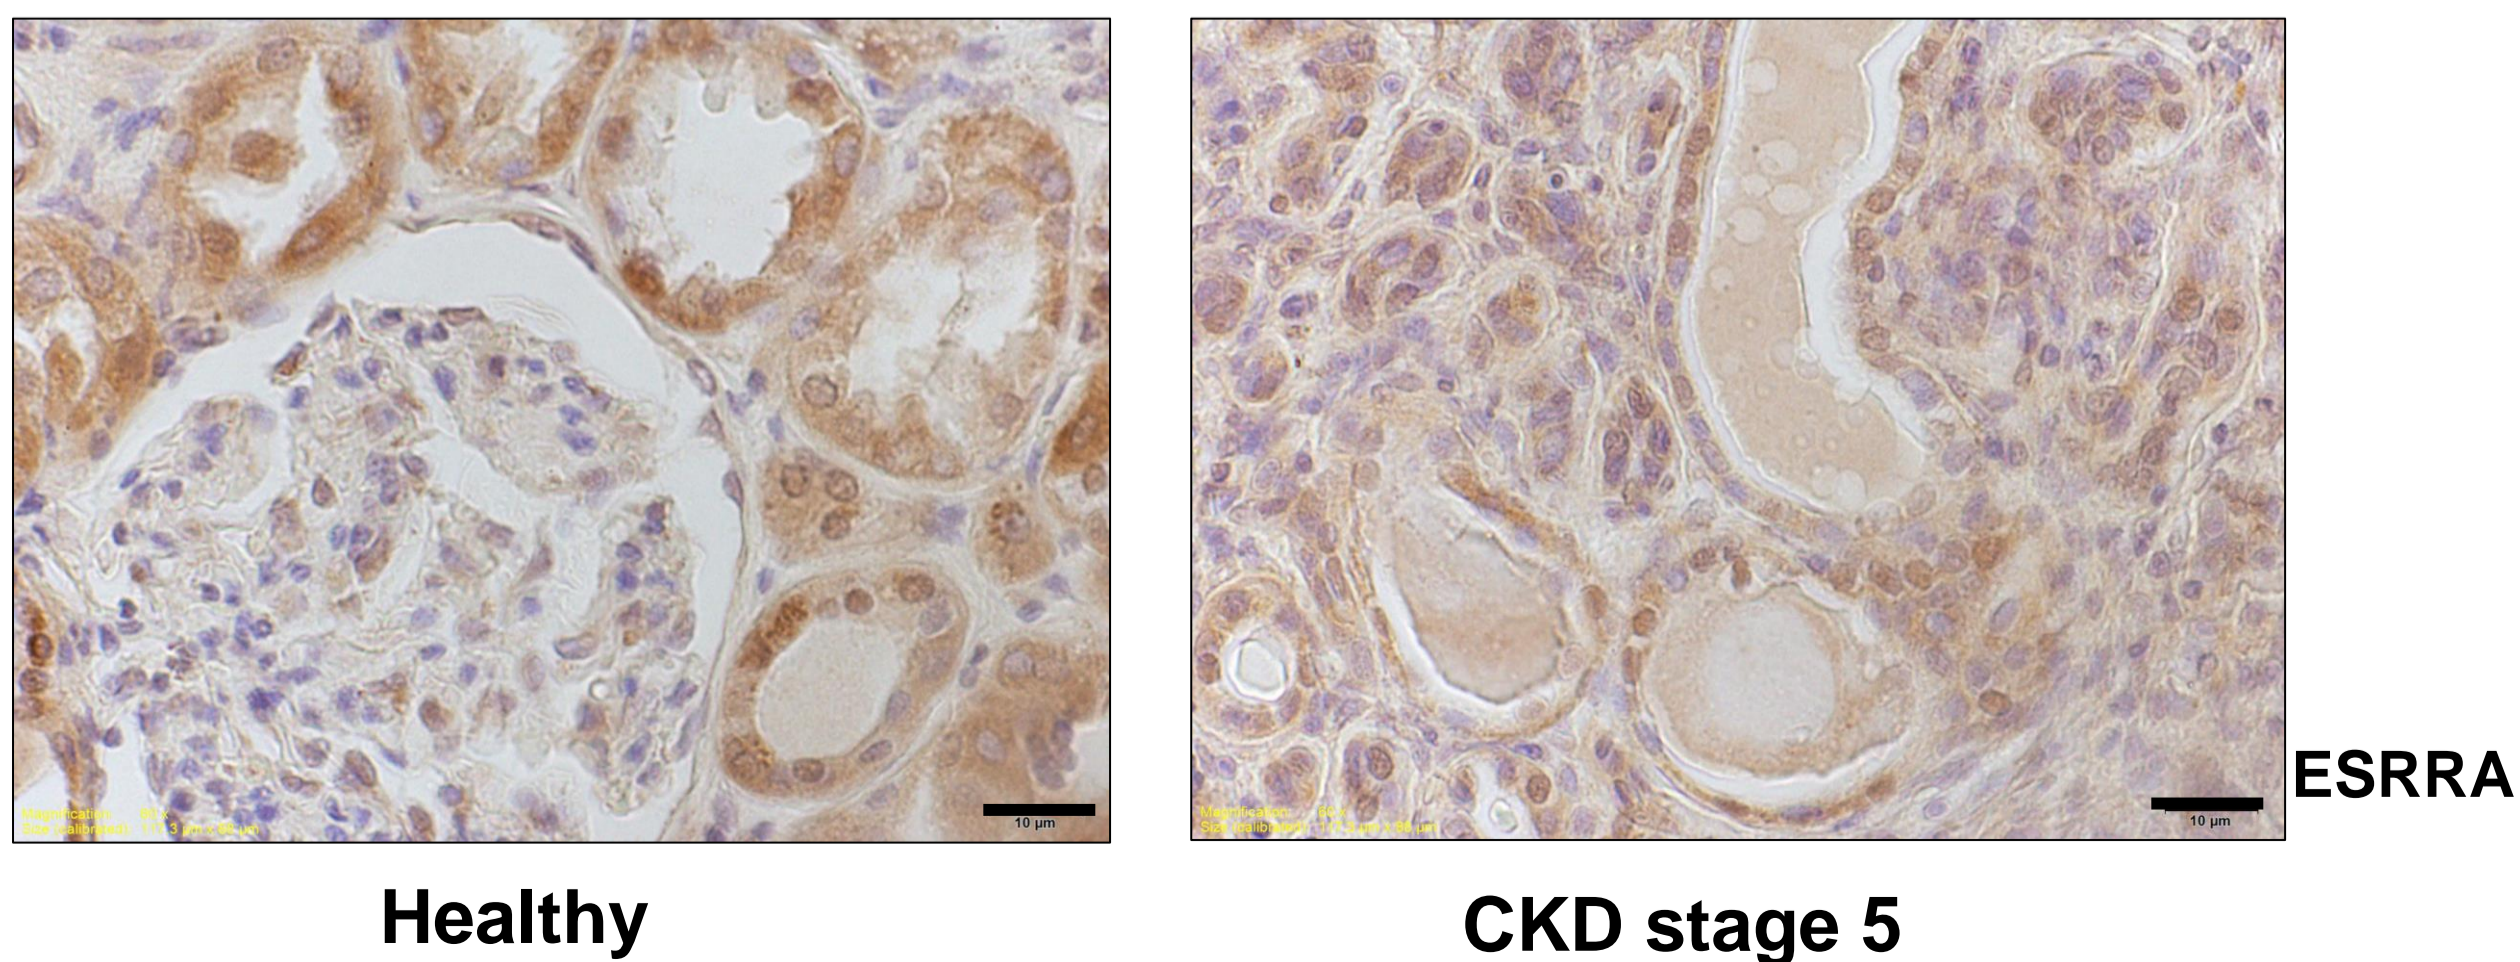

Supplement: NIHMS1817578-supplement-Supplemental_Figure_1_to_7.pdf [file NIHMS1817578-supplement-Supplemental_Figure_1_to_7.pdf]
